# Supplementary material
Source: publisher figshare collection journal article supplement (https://tandf.figshare.com/ndownloader/files/43813935)
Supplement: Supplementary file 1 [file 43813935]

## Sheet: Table3_sensitivity
	Mentalization profile HC vs. ED
		HC (N = 58)	ED (N = 30)	HC vs. ED (contrast and 95% CI)	p-value
	RFQ-C	0.97 [0.75; 1.20]	1.09 [0.76; 1.42]	0.12 [-0.30; 0.54]	0.581
	RFQ-U	0.70 [0.55; 0.86]	1.02 [0.74; 1.30]	0.31 [-0.01; 0.63]	0.058
	TAS-20	2.34 [2.15; 2.53]	2.78 [2.51; 3.06]	0.44 [0.11; 0.78]	0.010**
	RME	23.10 [20.86; 25.33]	25.68 [23.47; 27.89]	2.58 [-0.42; 5.58]	0.091
	Mentalization profile AN vs. BN
		AN (N = 23)	BN (N = 7)	AN vs. BN (contrast and 95% CI)	p-value
	RFQ-C	1.15 [0.74; 1.56]	1.01 [0.67; 1.34]	-0.14 [-0.66; 0.38]	0.585
	RFQ-U	0.83 [0.53; 1.14]	1.55 [1.21; 1.88]	0.71 [0.27; 1.16]	0.002**
	TAS-20	2.51 [2.22; 2.80]	3.40 [3.08; 3.72]	0.89 [0.46; 1.32]	0.000***
	RME	27.12 [25.75; 28.48]	23.62 [15.58; 31.66]	-3.50 [-11.67; 4.68]	0.402
